# Supplementary material for: Characterization of the genome and silk-gland transcriptomes of Darwin’s bark spider (Caerostris darwini)
Source: PLoS One. 2022 Jun 6;17(6):e0268660. doi: 10.1371/journal.pone.0268660 (PMC9170102; doi:10.1371/journal.pone.0268660)
Supplement: S4 Table — A list of the sequencing read file names and the type of library used in this study, including Illumina and PacBio technologies, with SRA accession numbers. (XLSX) [file pone.0268660.s013.xlsx]

## Sheet: ST4
S4 Table. DNA sequencing read files used in this study.
Library	Run ID	Read Lengths	Barcode Sequence	Read #1 Filename (.fastq)*	Read #2 Filename (.fastq)*	Raw Read Pairs	QC Filtered Read Pairs†	NCBI SRA Accession
TruSeq fragment	PGFI.58489, “HiSeq2500”	100x100 PE	CTTGTA	frags_HiSeq2500_Cae_R1	frags_HiSeq2500_Cae_R2	-	106841019	SRR15715450
TruSeq fragment	PGFI.58689, “HiSeq2000”	100x100 PE	CTTGTA	frags_HiSeq2000_Cae_R1	frags_HiSeq2000_Cae_R2	-	778537856	SRR15715451
TruSeq fragment	FGC0582, “newHiSeq2000”	100x100 PE	CTTGTA	frags_newHiSeq2000_Cae_R1	frags_newHiSeq2000_Cae_R2	-	49212159	SRR15715396
3 kb MPv2 jumping	PGFI.58489, “HiSeq2500”	100x100 PE	GCCAAT	jumps_3kb_HiSeq2500_Cae_R1	jumps_3kb_HiSeq2500_Cae_R2	-	17512350	SRR15715449
3 kb MPv2 jumping	PGFI.58689, “HiSeq2000”	100x100 PE	GCCAAT	jumps_3kb_HiSeq2000_Cae_R2	jumps_3kb_HiSeq2000_Cae_R2	-	82303530	SRR15715319
3 kb MPv2 jumping	FGC0582, “newHiSeq2000”	100x100 PE	GCCAAT	jumps_3kb_newHiSeq2000_Cae_R1	jumps_3kb_newHiSeq2000_Cae_R2	-	18024552	SRR15715438
5 kb MPv2 jumping	PGFI.58489, “HiSeq2500”	100x100 PE	ACAGTG	jumps_5kb_HiSeq2500_Cae_R1	jumps_5kb_HiSeq2500_Cae_R2	-	12157795	SRR15715405
5 kb MPv2 jumping	PGFI.58689, “HiSeq2000”	100x100 PE	ACAGTG	jumps_5kb_HiSeq2000_Cae_R1	jumps_5kb_HiSeq2000_Cae_R2	-	65151760	SRR15715416
5 kb MPv2 jumping	FGC0582, “newHiSeq2000”	100x100 PE	ACAGTG	jumps_5kb_newHiSeq2000_Cae_R1	jumps_5kb_newHiSeq2000_Cae_R2	-	14458630	SRR15715401
7 kb MPv2 jumping	PGFI.58489, “HiSeq2500”	100x100 PE	CGATGT	jumps_7kb_HiSeq2500_Cae_R1	jumps_7kb_HiSeq2500_Cae_R2	-	1004251	SRR15715397
7 kb MPv2 jumping	PGFI.58689, “HiSeq2000”	100x100 PE	CGATGT	jumps_7kb_HiSeq2000_Cae_R1	jumps_7kb_HiSeq2000_Cae_R2	-	17523737	SRR15715398
9 kb MPv2 jumping	PGFI.58489, “HiSeq2500”	100x100 PE	TGACCA	jumps_9kb_HiSeq2500_Cae_R1	jumps_9kb_HiSeq2500_Cae_R2	-	3412065	SRR15715393
9 kb MPv2 jumping	PGFI.58689, “HiSeq2000”	100x100 PE	TGACCA	jumps_9kb_HiSeq2000_Cae_R1	jumps_9kb_HiSeq2000_Cae_R2	-	25588876	SRR15715394
11 kb MPv2 jumping	PGFI.58489, “HiSeq2500”	100x100 PE	CAGATC	jumps_11kb_HiSeq2500_Cae_R1	jumps_11kb_HiSeq2500_Cae_R2	-	2617066	SRR15715374
11 kb MPv2 jumping	PGFI.58689, “HiSeq2000”	100x100 PE	CAGATC	jumps_11kb_HiSeq2000_Cae_R1	jumps_11kb_HiSeq2000_Cae_R2	-	18274482	SRR15715385
2 kb Nextera jumping (A+B)	FGC0640 + FGC0644, “Nextera”	100x100 PE	CAGATC + CTTGTA	jumps_2kb_Nextera_Cae_R1	jumps_2kb_Nextera_Cae_R2	-	35119115	SRR15715330
4 kb Nextera jumping (A+B)	FGC0640 + FGC0644, “Nextera”	100x100 PE	ACAGTG + GCCAAT	jumps_4kb_Nextera_Cae_R1	jumps_4kb_Nextera_Cae_R2	-	31068183	SRR15715427
6 kb Nextera jumping (A+B)	FGC0640 + FGC0644, “Nextera”	100x100 PE	CGATGT + TGACCA	jumps_6kb_Nextera_Cae_R1	jumps_6kb_Nextera_Cae_R2	-	40783003	SRR15715399
5 kb Nextera jumping	FGC0763 + FGC0766 + FGC0767, “Nextera”	100x100 PE	CTTGTA	jumps_5kb_Nextera_Cae_R1	jumps_5kb_Nextera_Cae_R2	-	6407271	SRR15715400
7 kb Nextera jumping	FGC0763 + FGC0766 + FGC0767, “Nextera”	100x100 PE	CAGATC	jumps_7kb_Nextera_Cae_R1	jumps_7kb_Nextera_Cae_R2	-	6785458	SRR15715395
9 kb Nextera jumping	FGC0763 + FGC0766 + FGC0767, “Nextera”	100x100 PE	GCCAAT	jumps_9kb_Nextera_Cae_R1	jumps_9kb_Nextera_Cae_R2	-	787639	SRR15715392
11 kb Nextera jumping	FGC0763 + FGC0766 + FGC0767, “Nextera”	100x100 PE	ACAGTG	jumps_11kb_Nextera_Cae_R1	jumps_11kb_Nextera_Cae_R2	-	1262774	SRR15715363
13 kb Nextera jumping	FGC0763 + FGC0766 + FGC0767, “Nextera”	100x100 PE	TGACCA	jumps_13kb_Nextera_Cae_R1	jumps_13kb_Nextera_Cae_R2	-	2600024	SRR15715352
17 kb Nextera jumping	FGC0763 + FGC0766 + FGC0767, “Nextera”	100x100 PE	CGATGT	jumps_17kb_Nextera_Cae_R1	jumps_17kb_Nextera_Cae_R2	-	7429813	SRR15715341
LR-PCR amplicon pool #1	PacBio RS II run #PBG-1096	SMRT	-	PBG-1096.BC1.BC1-1.CCS2	-	1349	-	SRR15715382
LR-PCR amplicon pool #1	PacBio RS II run #PBG-1096	SMRT	-	PBG-1096.BC2.BC2-2.CCS2	-	3030	-	SRR15715381
LR-PCR amplicon pool #1	PacBio RS II run #PBG-1096	SMRT	-	PBG-1096.BC3.BC3-3.CCS2	-	98	-	SRR15715380
LR-PCR amplicon pool #1	PacBio RS II run #PBG-1096	SMRT	-	PBG-1096.BC4.BC4-4.CCS2	-	74	-	SRR15715379
LR-PCR amplicon pool #1	PacBio RS II run #PBG-1096	SMRT	-	PBG-1096.BC5.BC5-5.CCS2	-	1580	-	SRR15715378
LR-PCR amplicon pool #1	PacBio RS II run #PBG-1096	SMRT	-	PBG-1096.BC6.BC6-6.CCS2	-	316	-	SRR15715377
LR-PCR amplicon pool #1	PacBio RS II run #PBG-1096	SMRT	-	PBG-1096.BC7.BC7-7.CCS2	-	281	-	SRR15715376
LR-PCR amplicon pool #1	PacBio RS II run #PBG-1096	SMRT	-	PBG-1096.BC8.BC8-8.CCS2	-	1395	-	SRR15715375
LR-PCR amplicon pool #1	PacBio RS II run #PBG-1096	SMRT	-	PBG-1096.BC9.BC9-9.CCS2	-	1562	-	SRR15715373
LR-PCR amplicon pool #1	PacBio RS II run #PBG-1096	SMRT	-	PBG-1096.BC10.BC10-10.CCS2	-	368		SRR15715372
LR-PCR amplicon pool #1	PacBio RS II run #PBG-1096	SMRT	-	PBG-1096.BC11.BC11-11.CCS2	-	587		SRR15715371
LR-PCR amplicon pool #1	PacBio RS II run #PBG-1096	SMRT	-	PBG-1096.BC12.BC12-12.CCS2	-	431	-	SRR15715370
LR-PCR amplicon pool #1	PacBio RS II run #PBG-1096	SMRT	-	PBG-1096.BC13.BC13-13.CCS2	-	1273	-	SRR15715369
LR-PCR amplicon pool #1	PacBio RS II run #PBG-1096	SMRT	-	PBG-1096.BC15.BC15-15.CCS2	-	188	-	SRR15715368
LR-PCR amplicon pool #1	PacBio RS II run #PBG-1096	SMRT	-	PBG-1096.BC16.BC16-16.CCS2	-	941	-	SRR15715367
LR-PCR amplicon pool #1	PacBio RS II run #PBG-1096	SMRT	-	PBG-1096.BC17.BC17-17.CCS2	-	230	-	SRR15715366
LR-PCR amplicon pool #1	PacBio RS II run #PBG-1096	SMRT	-	PBG-1096.BC18.BC18-18.CCS2	-	456	-	SRR15715365
LR-PCR amplicon pool #1	PacBio RS II run #PBG-1096	SMRT	-	PBG-1096.BC19.BC19-19.CCS2	-	324	-	SRR15715364
LR-PCR amplicon pool #1	PacBio RS II run #PBG-1096	SMRT	-	PBG-1096.BC20.BC20-20.CCS2	-	84	-	SRR15715362
LR-PCR amplicon pool #1	PacBio RS II run #PBG-1096	SMRT	-	PBG-1096.BC21.BC21-21.CCS2	-	336	-	SRR15715361
LR-PCR amplicon pool #1	PacBio RS II run #PBG-1096	SMRT	-	PBG-1096.BC22.BC22-22.CCS2	-	158	-	SRR15715360
LR-PCR amplicon pool #1	PacBio RS II run #PBG-1096	SMRT	-	PBG-1096.BC23.BC23-23.CCS2	-	74	-	SRR15715359
LR-PCR amplicon pool #1	PacBio RS II run #PBG-1096	SMRT	-	PBG-1096.BC24.BC24-24.CCS2	-	973	-	SRR15715358
LR-PCR amplicon pool #1	PacBio RS II run #PBG-1096	SMRT	-	PBG-1096.BC25.BC25-25.CCS2	-	72	-	SRR15715357
LR-PCR amplicon pool #1	PacBio RS II run #PBG-1096	SMRT	-	PBG-1096.BC26.BC26-26.CCS2	-	81	-	SRR15715356
LR-PCR amplicon pool #1	PacBio RS II run #PBG-1096	SMRT	-	PBG-1096.BC27.BC27-27.CCS2	-	294	-	SRR15715355
LR-PCR amplicon pool #1	PacBio RS II run #PBG-1096	SMRT	-	PBG-1096.BC28.BC28-28.CCS2	-	855	-	SRR15715354
LR-PCR amplicon pool #2	PacBio RS II run #PBG-1423	SMRT	-	PBG-1423.BC29.PB_1.DEMUX.003599	-	5784	-	SRR15715353
LR-PCR amplicon pool #2	PacBio RS II run #PBG-1423	SMRT	-	PBG-1423.BC30.PB_2.DEMUX.003599	-	4772	-	SRR15715351
LR-PCR amplicon pool #2	PacBio RS II run #PBG-1423	SMRT	-	PBG-1423.BC31.PB_3.DEMUX.003599	-	3072	-	SRR15715350
LR-PCR amplicon pool #2	PacBio RS II run #PBG-1423	SMRT	-	PBG-1423.BC32.PB_4.DEMUX.003599	-	1826	-	SRR15715349
LR-PCR amplicon pool #2	PacBio RS II run #PBG-1423	SMRT	-	PBG-1423.BC33.PB_5.DEMUX.003599	-	4775	-	SRR15715348
LR-PCR amplicon pool #2	PacBio RS II run #PBG-1423	SMRT	-	PBG-1423.BC34.PB_6.DEMUX.003599	-	4315	-	SRR15715347
LR-PCR amplicon pool #2	PacBio RS II run #PBG-1423	SMRT	-	PBG-1423.BC35.PB_7.DEMUX.003599	-	4726	-	SRR15715346
LR-PCR amplicon pool #2	PacBio RS II run #PBG-1423	SMRT	-	PBG-1423.BC36.PB_8.DEMUX.003599	-	4018	-	SRR15715345
LR-PCR amplicon pool #2	PacBio RS II run #PBG-1423	SMRT	-	PBG-1423.BC37.PB_9.DEMUX.003599	-	5510	-	SRR15715344
LR-PCR amplicon pool #2	PacBio RS II run #PBG-1423	SMRT	-	PBG-1423.BC38.PB_10.DEMUX.003599	-	1169	-	SRR15715343
LR-PCR amplicon pool #2	PacBio RS II run #PBG-1423	SMRT	-	PBG-1423.BC39.PB_11.DEMUX.003599	-	6664	-	SRR15715342
LR-PCR amplicon pool #2	PacBio RS II run #PBG-1423	SMRT	-	PBG-1423.BC40.PB_12.DEMUX.003599	-	2470	-	SRR15715340
LR-PCR amplicon pool #2	PacBio RS II run #PBG-1423	SMRT	-	PBG-1423.BC41.PB_13.DEMUX.003599	-	5854	-	SRR15715339
LR-PCR amplicon pool #2	PacBio RS II run #PBG-1423	SMRT	-	PBG-1423.BC42.PB_14.DEMUX.003599	-	4978	-	SRR15715338
LR-PCR amplicon pool #2	PacBio RS II run #PBG-1423	SMRT	-	PBG-1423.BC43.PB_15.DEMUX.003599	-	4588	-	SRR15715337
LR-PCR amplicon pool #2	PacBio RS II run #PBG-1423	SMRT	-	PBG-1423.BC44.PB_16.DEMUX.003599	-	4540	-	SRR15715336
LR-PCR amplicon pool #2	PacBio RS II run #PBG-1423	SMRT	-	PBG-1423.BC45.PB_17.DEMUX.003599	-	4293	-	SRR15715335
LR-PCR amplicon pool #2	PacBio RS II run #PBG-1423	SMRT	-	PBG-1423.BC46.PB_18.DEMUX.003599	-	1518	-	SRR15715334
LR-PCR amplicon pool #2	PacBio RS II run #PBG-1423	SMRT	-	PBG-1423.BC47.PB_19.DEMUX.003599	-	5572	-	SRR15715333
LR-PCR amplicon pool #2	PacBio RS II run #PBG-1423	SMRT	-	PBG-1423.BC48.PB_20.DEMUX.003599	-	5919	-	SRR15715332
LR-PCR amplicon pool #2	PacBio RS II run #PBG-1423	SMRT	-	PBG-1423.BC49.PB_21.DEMUX.003599	-	2231	-	SRR15715331
LR-PCR amplicon pool #2	PacBio RS II run #PBG-1423	SMRT	-	PBG-1423.BC50.PB_22.DEMUX.003599	-	397	-	SRR15715329
LR-PCR amplicon pool #2	PacBio RS II run #PBG-1423	SMRT	-	PBG-1423.BC51.PB_23.DEMUX.003599	-	1559	-	SRR15715328
LR-PCR amplicon pool #2	PacBio RS II run #PBG-1423	SMRT	-	PBG-1423.BC52.PB_24.DEMUX.003599	-	1109	-	SRR15715327
LR-PCR amplicon pool #2	PacBio RS II run #PBG-1423	SMRT	-	PBG-1423.BC53.PB_25.DEMUX.003599	-	1321	-	SRR15715326
LR-PCR amplicon pool #2	PacBio RS II run #PBG-1423	SMRT	-	PBG-1423.BC54.PB_26.DEMUX.003599	-	2560	-	SRR15715325
LR-PCR amplicon pool #3	PacBio RS II run #PBG-1890	SMRT	-	PBG-1890.BC1-1.7.CCS2.004787	-	341	-	SRR15715324
LR-PCR amplicon pool #3	PacBio RS II run #PBG-1890	SMRT	-	PBG-1890.BC2-2.1.CCS2.004795	-	1778	-	SRR15715323
LR-PCR amplicon pool #3	PacBio RS II run #PBG-1890	SMRT	-	PBG-1890.BC3-3.2.CCS2.004788	-	9192	-	SRR15715322
LR-PCR amplicon pool #3	PacBio RS II run #PBG-1890	SMRT	-	PBG-1890.BC4-4.3.CCS2.004792	-	1526	-	SRR15715321
LR-PCR amplicon pool #3	PacBio RS II run #PBG-1890	SMRT	-	PBG-1890.BC6-6.4.CCS2.004790	-	1041	-	SRR15715320
LR-PCR amplicon pool #3	PacBio RS II run #PBG-1890	SMRT	-	PBG-1890.BC7-7.5.CCS2.004794	-	1084	-	SRR15715318
LR-PCR amplicon pool #3	PacBio RS II run #PBG-1890	SMRT	-	PBG-1890.BC8-8.6.CCS2.004796	-	813	-	SRR15715317
LR-PCR amplicon pool #3	PacBio RS II run #PBG-1890	SMRT	-	PBG-1890.BC9-9.12.CCS2.004781	-	3399	-	SRR15715316
LR-PCR amplicon pool #3	PacBio RS II run #PBG-1890	SMRT	-	PBG-1890.BC10-10.13.CCS2.004784	-	2806	-	SRR15715315
LR-PCR amplicon pool #3	PacBio RS II run #PBG-1890	SMRT	-	PBG-1890.BC11-11.20.CCS2.004782	-	569	-	SRR15715314
LR-PCR amplicon pool #3	PacBio RS II run #PBG-1890	SMRT	-	PBG-1890.BC13-13.17.CCS2.004783	-	15617	-	SRR15715313
LR-PCR amplicon pool #3	PacBio RS II run #PBG-1890	SMRT	-	PBG-1890.BC14-14.19.CCS2.004799	-	3415	-	SRR15715312
LR-PCR amplicon pool #3	PacBio RS II run #PBG-1890	SMRT	-	PBG-1890.BC15-15.25.CCS2.004798	-	4597	-	SRR15715311
LR-PCR amplicon pool #3	PacBio RS II run #PBG-1890	SMRT	-	PBG-1890.BC19-19.37.CCS2.004786	-	7	-	SRR15715310
LR-PCR amplicon pool #3	PacBio RS II run #PBG-1890	SMRT	-	PBG-1890.BC21-21.39.CCS2.004785	-	37	-	SRR15715309
LR-PCR amplicon pool #3	PacBio RS II run #PBG-1890	SMRT	-	PBG-1890.BC22-22.45.CCS2.004793	-	70	-	SRR15715448
LR-PCR amplicon pool #3	PacBio RS II run #PBG-1890	SMRT	-	PBG-1890.BC33-33.35.CCS2.004789	-	22	-	SRR15715447
LR-PCR amplicon pool #4	PacBio RS II run #PBG-1902	SMRT	-	PBG-1902.BC1-1.11.CCS2.004842	-	690	-	SRR15715446
LR-PCR amplicon pool #4	PacBio RS II run #PBG-1902	SMRT	-	PBG-1902.BC2-2.14.CCS2.004841	-	1529	-	SRR15715445
LR-PCR amplicon pool #4	PacBio RS II run #PBG-1902	SMRT	-	PBG-1902.BC3-3.16.CCS2.004840	-	1237	-	SRR15715444
LR-PCR amplicon pool #4	PacBio RS II run #PBG-1902	SMRT	-	PBG-1902.BC4-4.22.CCS2.004838	-	1161	-	SRR15715443
LR-PCR amplicon pool #4	PacBio RS II run #PBG-1902	SMRT	-	PBG-1902.BC5-5.23.CCS2.004832	-	1860	-	SRR15715442
LR-PCR amplicon pool #4	PacBio RS II run #PBG-1902	SMRT	-	PBG-1902.BC6-6.27.CCS2.004837	-	1259	-	SRR15715441
LR-PCR amplicon pool #4	PacBio RS II run #PBG-1902	SMRT	-	PBG-1902.BC7-7.41.CCS2.004827	-	536	-	SRR15715440
LR-PCR amplicon pool #4	PacBio RS II run #PBG-1902	SMRT	-	PBG-1902.BC15-15.43.CCS2.004834	-	6	-	SRR15715439
LR-PCR amplicon pool #4	PacBio RS II run #PBG-1902	SMRT	-	PBG-1902.BC17-17.15.CCS2.004830	-	2900	-	SRR15715437
LR-PCR amplicon pool #4	PacBio RS II run #PBG-1902	SMRT	-	PBG-1902.BC18-18.21.CCS2.004835	-	2122	-	SRR15715436
LR-PCR amplicon pool #4	PacBio RS II run #PBG-1902	SMRT	-	PBG-1902.BC22-22.10.CCS2.004829	-	18184	-	SRR15715435
LR-PCR amplicon pool #4	PacBio RS II run #PBG-1902	SMRT	-	PBG-1902.BC23-23.44.CCS2.004833	-	1	-	SRR15715434
LR-PCR amplicon pool #4	PacBio RS II run #PBG-1902	SMRT	-	PBG-1902.BC30-30.18.CCS2.004839	-	2603	-	SRR15715433
LR-PCR amplicon pool #4	PacBio RS II run #PBG-1902	SMRT	-	PBG-1902.BC31-31.46.CCS2.004828	-	7	-	SRR15715432
LR-PCR amplicon pool #4	PacBio RS II run #PBG-1902	SMRT	-	PBG-1902.BC38-38.28.CCS2.004836	-	4151	-	SRR15715431
LR-PCR amplicon pool #4	PacBio RS II run #PBG-1902	SMRT	-	PBG-1902.BC39-39.49.CCS2.004831	-	5	-	SRR15715430
LR-PCR amplicon pool #5	PacBio RS II run #PBG-1903	SMRT	-	PBG-1903.BC6-6.8.CCS2.004825	-	6266	-	SRR15715429
LR-PCR amplicon pool #5	PacBio RS II run #PBG-1903	SMRT	-	PBG-1903.BC7-7.29.CCS2.004824	-	9854	-	SRR15715428
LR-PCR amplicon pool #5	PacBio RS II run #PBG-1903	SMRT	-	PBG-1903.BC14-14.9.CCS2.004810	-	2477	-	SRR15715426
LR-PCR amplicon pool #5	PacBio RS II run #PBG-1903	SMRT	-	PBG-1903.BC19-19.24.CCS2.004821	-	2880	-	SRR15715425
LR-PCR amplicon pool #5	PacBio RS II run #PBG-1903	SMRT	-	PBG-1903.BC20-20.30.CCS2.004811	-	867	-	SRR15715424
LR-PCR amplicon pool #5	PacBio RS II run #PBG-1903	SMRT	-	PBG-1903.BC21-21.47.CCS2.004820	-	7	-	SRR15715423
LR-PCR amplicon pool #5	PacBio RS II run #PBG-1903	SMRT	-	PBG-1903.BC22-22.50.CCS2.004816	-	2365	-	SRR15715422
LR-PCR amplicon pool #5	PacBio RS II run #PBG-1903	SMRT	-	PBG-1903.BC23-23.51.CCS2.004815	-	1791	-	SRR15715421
LR-PCR amplicon pool #5	PacBio RS II run #PBG-1903	SMRT	-	PBG-1903.BC24-24.52.CCS2.004814	-	7899	-	SRR15715420
LR-PCR amplicon pool #5	PacBio RS II run #PBG-1903	SMRT	-	PBG-1903.BC58-58.26.CCS2.004823	-	1299	-	SRR15715419
LR-PCR amplicon pool #5	PacBio RS II run #PBG-1903	SMRT	-	PBG-1903.BC59-59.31.CCS2.004813	-	1741	-	SRR15715418
LR-PCR amplicon pool #5	PacBio RS II run #PBG-1903	SMRT	-	PBG-1903.BC60-60.32.CCS2.004819	-	1683	-	SRR15715417
LR-PCR amplicon pool #5	PacBio RS II run #PBG-1903	SMRT	-	PBG-1903.BC61-61.33.CCS2.004818	-	1584	-	SRR15715415
LR-PCR amplicon pool #5	PacBio RS II run #PBG-1903	SMRT	-	PBG-1903.BC62-62.34.CCS2.004817	-	3347	-	SRR15715414
LR-PCR amplicon pool #5	PacBio RS II run #PBG-1903	SMRT	-	PBG-1903.BC63-63.40.CCS2.004822	-	47	-	SRR15715413
LR-PCR amplicon pool #5	PacBio RS II run #PBG-1903	SMRT	-	PBG-1903.BC72-72.48.CCS2.004812	-	145	-	SRR15715412
LR-PCR amplicon pool #4	PacBio RS II run #PBG-2041	SMRT	-	PBG-2041.BC20-20.Amp30.CCS2.005360	-	17146	-	SRR15715411
LR-PCR amplicon pool #4	PacBio RS II run #PBG-2041	SMRT	-	PBG-2041.BC21-21.Amp47.CCS2.005359	-	122	-	SRR15715410
LR-PCR amplicon pool #5	PacBio RS II run #PBG-2042	SMRT	-	PBG-2042.BC14-14.Amp19.CCS2.005363	-	10790	-	SRR15715409
LR-PCR amplicon pool #5	PacBio RS II run #PBG-2042	SMRT	-	PBG-2042.BC15-15.Amp25.CCS2.005362	-	16198	-	SRR15715408
LR-PCR amplicon pool #5	PacBio RS II run #PBG-2042	SMRT	-	PBG-2042.BC18-18.Amp36.CCS2.005367	-	2	-	SRR15715407
LR-PCR amplicon pool #5	PacBio RS II run #PBG-2042	SMRT	-	PBG-2042.BC19-19.Amp37.CCS2.005366	-	30	-	SRR15715406
LR-PCR amplicon pool #5	PacBio RS II run #PBG-2042	SMRT	-	PBG-2042.BC23-23.Amp44.CCS2.005365	-	7	-	SRR15715404
LR-PCR amplicon pool #5	PacBio RS II run #PBG-2042	SMRT	-	PBG-2042.BC33-33.Amp35.CCS2.005368	-	49	-	SRR15715403
LR-PCR amplicon pool #5	PacBio RS II run #PBG-2042	SMRT	-	PBG-2042.BC39-39.Amp49.CCS2.005364	-	87	-	SRR15715402
*: All FASTQ read files report quality scores using the “Illumina 1.9 / Sanger” encoding format.
†: Fragment reads were QC filtered for errors, and trimmed to remove adapter artifacts. Only paired reads with both reads having lengths ≥25 bp were retained for assembly.
†: Jumping reads were QC filtered for errors, trimmed to remove adapter and circularization artifacts, and all duplicate read pairs were eliminated.
†: Trimmed versions of the fragment read FASTQ files have the suffix “*_R?_trim.fastq.gz”, and trimmed unique versions of the jumping read FASTQ files have the suffix “*_R?_trim_uniq.fasta.gz”.
