# Supplementary material for: Characterization of the genome and silk-gland transcriptomes of Darwin’s bark spider (Caerostris darwini)
Source: PLoS One. 2022 Jun 6;17(6):e0268660. doi: 10.1371/journal.pone.0268660 (PMC9170102; doi:10.1371/journal.pone.0268660)
Supplement: S9 Table — A summary of annotation for various gene models of increasing stringency (Max, Standard, Silver, Gold, Platium). (XLSX) [file pone.0268660.s018.xlsx]

## Sheet: ST9
S9 Table. Genome annotation metrics.
Annotation Type	Feature Counta	Software
Repetitive Elements	1663058	RepeatMasker, RepeatRunner
Aligned Transcripts	1618548	Blastn, est2genome, cdna2genome
Aligned Proteins	4720146	Blastx, Tblastx, protein2genome
tRNA Models (+ Components)	45486	tRNAscan, Maker
Gene Predictions	1150238	Snap (+ masked), Augustus (+ masked)
Contig	45784	Maker
Total Non-genic Annotations	9197476
	Gene Model Sets
Model Set Filters	Maxb	Standardb	Silver	Gold	Platinum	tRNA	Spidroins
Pfam Domain?	-	Required	Required	Required	Required	-	-
AED < 1.0?	-	-	Required	Required	Required	-	-
Prot/RNA Evidence?	-	-	-	Required	Required	-	Required
MET Start?	-	-	-	-	Required	-	Required
Alt. Transcripts	-	-	-	-	Removed	-	-
Swiss/UniProt?	-	-	-	-	Required	-	-
# Swiss/UniProt mRNA Hits	38275	30916	17581	7046	6592	-	-
BUSCO Hits?	Included	Included	Included	Included	Included	-	-
BUSCO Scores (%E; %A)c	90%; 91%	90%; 91%	90%; 91%	90%; 91%	90%; 91%	-	-
Gene Modelsd	410081	56414	42108	14894	13505	15070
Mean AEDe (SD)	0.94 (0.20)	0.55 (0.35)	0.40 (0.27)	0.39 (0.25)	0.37 (0.25)	0.99 (0.06)	-
Median AED	1	0.48	0.36	0.35	0.34	1	-
Gene Model Components
mRNAs	410530	56863	42557	15343	13508	15,070 (tRNA)
CDS (Components)	1271880	206391	150968	79288	72049	-
5' UTRs	4657	1540	1307	832	630	-
3' UTRs	2305	688	502	270	169	-
Exons	1272792	205760	150055	78182	71716	15346
Total Genic Annotations	3,372,245f	527656	387497	188809	171577	45486
a = Sub-features (e.g., “match_part”) are not included in the reported feature counts.
b = Max and Standard gene set filtering scripts courtesy of K. Childs.
c = BUSCO Scores reflects the percentage of complete (single and duplicated) hits from Eukaryota (“E”) and Arthropoda (“A”) BUSCO datasets for each C. darwini gene annotation set.
d = Gene sets do not contain manually curated spidroin annotations, which are provided in a separate annotation file.
e = AED: Annotation Edit Distance
f = Sum of all non-genic (9,197,476) features plus all genic features from the Max gene set (3,372,245) equals a grand total 12,569,721 unique annotations. (“tRNA” and “Spidroin” annotations are NOT included in this feature count).)
